# Supplementary material
Source: publisher figshare collection journal article supplement (https://frontiersin.figshare.com/ndownloader/files/22530524)
Supplement: Supplementary file [file 22530524]

# Supplementary Material

## A DATASET AND TRAINING DETAILS

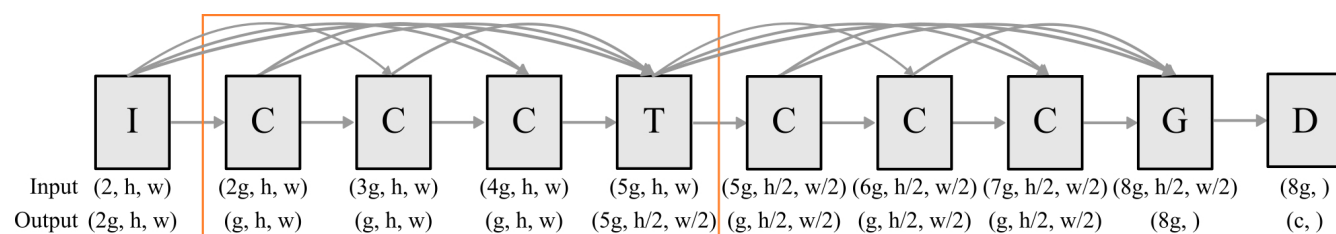

Figure S1: Connectivity of a DenseNet (Huang et al., 2017) with  $N_l = 3$  layers per block (orange) and  $N_b = 2$  blocks. The letters correspond to I: initial convolution, C: convolutional layer, T: transition layer (convolution + pooling), G: global pooling, D: fully-connected layer. Input and output shapes depend on a single hyperparameter, the growth factor  $g$ . The shapes are given as (channel,  $y$ ,  $x$ ), omitting the batch dimension. The last output channel is the number of classes  $c$ . We use average pooling in all our experiments.

We use streaming rollouts of the DenseNet network model for all our experiments (see Fig. S1). At the beginning of training for  $N_e$  epochs, we set the learning rate to  $l_t = 0.001$ . We multiply the learning rate by 0.1 after  $0.6N_e$  and again after  $0.8N_e$  epochs. After each epoch, we measure the average accuracy across all outputs  $y$  on our validation set and, if the value increased, we save this model as the new best model. For our results shown in the main text, we evaluate this best model on the test set. Whenever we report averages over multiple runs, each trial uses a different random number generator seed to initialize all weights. 20% of the training data are randomly selected (but fixed over the course of multiple trials) and used as a validation set to tune hyperparameters.

The following hyperparameters are used for all datasets if not denoted otherwise in the specific sections.

| name                              | symbol     | value             |
|-----------------------------------|------------|-------------------|
| number of blocks                  | $N_b$      | 3                 |
| layers per block                  | $N_l$      | 5                 |
| growth rate of DenseNet           | $g$        | 9                 |
| kernel size of convolution        | $k_x, k_y$ | $3 \times 3$      |
| padding                           |            | SAME              |
| pooling type                      |            | Average pooling   |
| bias                              |            | 0                 |
| initialization                    |            | he_normal         |
| activation function               |            | ReLU              |
| dropout: spatial dropout, rate    |            | 0.2               |
| number of training epochs         | $N_e$      | 300               |
| activation decay: L2-norm, weight |            | $1 \cdot 10^{-4}$ |
| weight decay: L2-norm, weight     |            | $1 \cdot 10^{-5}$ |
| batch size                        |            | 32                |

## A.1 Moving Rectangles dataset

This dataset contains 10000 training and 2000 test samples. Each sample consists of two images of size  $10 \times 60$ . In the first and second image, a rectangle of size  $10 \times 5$  is placed at a random position inside the image boundaries. The relative position of the rectangles between both images defines the direction of movement (left or right). The rectangle can be placed at any position except for directly at the border of the image. The jump is then calculated by first drawing the direction (with probability 0.5 for both directions) and then determining the maximum jump distance  $j_{\max}$  such that the whole rectangle is still in the image (in pixels). The actual jump value is then drawn uniformly between  $[1, j_{\max}]$ . The dataset is sparse, i.e. approximately 97.6% of the pixels are zero. No data augmentation is used.

Specific hyperparameters of the used DenseNet:

| name                      | symbol | value |
|---------------------------|--------|-------|
| growth rate of DenseNet   | $g$    | 20    |
| layers per block          | $N_l$  | 1     |
| number of training epochs | $N_e$  | 100   |

## A.2 N-CARS

Samples have different resolutions. First, we convert the events to frames (for details, see Section 2.3). Then, we resize the input frames to  $40 \times 30$  pixels. To normalize the network input, we calculate the mean  $\mu$  and standard deviation  $\sigma$  for each sample  $I$  (i.e., averaged over all dimensions) and scale each sample  $I \rightarrow (I - \mu)/(6\sigma) + 0.5$ , followed by clipping each value of  $I$  to  $[0, 1]$ . During training we augment single sequences of input frames by horizontal flips, and random shifts by 4 and 3 pixels in horizontal and vertical direction, respectively. Workflow of tuning the hyperparameters:

- Sweeping learning rate  $l_r$  over  $\{0.00022, 0.00046, \mathbf{0.001}, 0.0022, 0.0046\}$ :  $l_r = 0.001$  results in highest accuracy on the validation set.
- Sweeping number  $N$  of input frames over  $\{1, 2, 4, \mathbf{8}, 16\}$ :  $N = 8$  frames are the smallest number of input frames with highest accuracy on the validation set.
- Sweeping growth rate  $g$  over  $[6, \mathbf{9}, 12, 15, 18]$ , i.e. the number of output channels of the convolutional layers within the DenseNet blocks:  $g = 9$  channels are the smallest number of channels with highest accuracy on the validation set.
- For all above sweeps the best values from the other sweeps are used.

The best number of simulation steps per rollout frame is chosen after sweeping over  $\{5, 10, 15, 20, 25, 30, 35\}$  steps using 1280 randomly chosen samples from the training set (see **Figure 1C**).

## A.3 N-MNIST

The N-MNIST dataset has a spatial resolution of  $34 \times 34$  pixels. No data augmentation is used.

## B SYMBOL REFERENCE

| symbol                   | name                       | Description                                                       |
|--------------------------|----------------------------|-------------------------------------------------------------------|
| $N$                      | number of frames           | Number of frames that each data sample is divided into            |
| $T_F$                    | frame time                 | Time over which spikes are accumulated to generate a frame        |
| $N_b$                    | number of blocks           | Number of blocks of a network. See Fig. S1                        |
| $N_l$                    | layers per block           | Number of layers per block. See Fig. S1                           |
| $g$                      | growth factor              | Scales number of output channels in DenseNet. See Fig. S1         |
| $d_{\text{ANN}}$         | synaptic delay of ANN      | Number of rollout frames information is delayed at each synapse   |
| $D$                      | depth                      | Length of path in ANN/SNN that passes the most edges              |
| $l_s$                    | shortest path              | Path from one input to one output that passes the least edges     |
| $K$                      | number of rollout frames   | Number of steps from first input to last output                   |
| $y_i$                    | network prediction         | Non-normalized output of the network at rollout frame $i$         |
| $T_{\text{max}}$         | sequence length            | Time difference between last and first spike in a sequence        |
| $\mathbf{F}_{\text{in}}$ | frames                     | All frames of a sample                                            |
| $F$                      | frame                      | A frame of a sample                                               |
| $\hat{y}$                | class label                | One-hot label of a sample                                         |
| $l_r$                    | learning rate              | Learning rate during training                                     |
| $N_e$                    | number of epochs           | Number of epochs to train                                         |
| $a_k$                    | loss weight                | Weight assigned to each output $k$ to tune early-to-late accuracy |
| $\rho$                   | accuracy ratio             | Ratio of area of ANN and SNN accuracy                             |
| $V_i$                    | membrane voltage           | Membrane voltage of neuron $i$                                    |
| $V_{\text{th}}$          | membrane threshold         | Threshold at which the neurons emits a spike                      |
| $d$                      | synaptic delay of SNN      | Number of simulation steps information is delayed at each synapse |
| $r_i$                    | neuron firing rate         | Firing rate of neuron $i$                                         |
| $r_{\text{max}}$         | maximum firing rate        | Maximum possible firing rate                                      |
| $\mathbf{S}$             | spike train                | All spikes in a defined time interval                             |
| $\mathbf{S}_{\text{in}}$ | spike input sequence       | All spikes of a sample                                            |
| $n_{\text{sf}}$          | simulation steps per frame | Number of simulation steps per frame                              |
| $T_{\text{tot}}$         | number of simulation steps | Total number of simulation steps                                  |
| $f$                      | simulator throughput       | Throughput of the simulator/emulator                              |

## REFERENCES

Huang, G., Liu, Z., and Weinberger, K. Q. (2017). Densely connected convolutional networks. In *The IEEE Conference on Computer Vision and Pattern Recognition (CVPR)* 1
